# Supplementary material
Source: publisher figshare collection journal article supplement (https://karger.figshare.com/ndownloader/files/31070425)
Supplement: Supplementary file 1 [file 31070425]

Supplementary Table 5. The baseline characteristics of included and lost to follow-up study subjects.

| Characteristics | Included subjects  (N1=23262) | Excluded subjects (N2=3064) | *p value* |
| --- | --- | --- | --- |
| Male, n (%) | 14347(61.7) | 1890(61.7) | 0.993 |
| Age (years), *M* (P25,P75) | 43(38,50) | 45(39,54) | <0.001 |
| Education level, n (%) |  |  | <0.001 |
| Junior high school or below | 8479(36.5) | 893(29.1) |  |
| High or secondary school | 6759(29.1) | 625(20.4) |  |
| Junior college or above | 8024(34.5) | 1546(50.5) |  |
| Household income (RMB), n (%) |  |  | <0.001 |
| < 2000 | 12215(52.5) | 1262(41.2) |  |
| ≧ 2000 | 11047(47.5) | 1802(58.8) |  |
| Occupational, n (%) |  |  | <0.001 |
| Cadre | 2479(10.7) | 1098(35.8) |  |
| Technical staff | 1075(4.6) | 167(5.5) |  |
| Worker | 18684(80.3) | 1673(54.6) |  |
| Logistical service personnel | 1024(4.4) | 126(4.1) |  |
| Smoking status, n (%) |  |  | 0.002 |
| Never smoker | 12679(54.5) | 1758(57.4) |  |
| Current smoker | 8905(38.3) | 1074(35.1) |  |
| Former smoker | 1678(7.2) | 232(7.6) |  |
| Drinking status, n (%) |  |  | 0.834 |
| Never drinker | 17269(74.2) | 2284(74.5) |  |
| Current drinker | 5110(22.0) | 660(21.5) |  |
| Former drinker | 883(3.8) | 120(3.9) |  |
| Exercising status, n (%) |  |  | <0.001 |
| Never exerciser | 3305(14.2) | 348(11.4) |  |
| Occasionally exerciser | 9665(41.5) | 1196(39.0) |  |
| Frequently exerciser | 10292(44.2) | 1520(49.6) |  |
| SUA level, n (%) |  |  | 0.031 |
| Normal SUA | 19814(85.2) | 2561(86.7) |  |
| Hyperuricemia | 3448(14.8) | 394(13.3) |  |
| Family history of stroke, n (%) | 1085(4.7) | 147(4.8) | 0.742 |
| BMI (kg/m2), *M* (P25,P75) | 23.33(21.19,25.61) | 23.40(21.20,25.60) | 0.537 |
| SBP (mmHg), *M* (P25,P75) | 121(109,133) | 122(110,134) | 0.003 |
| DBP (mmHg), *M* (P25,P75) | 77(70,85) | 77(70,86) | 0.014 |
| TC (mmol/L), *M* (P25,P75) | 4.60(4.10,5.20) | 4.70(4.10,5.30) | 0.008 |
| TG (mmol/L), *M* (P25,P75) | 1.50(1.10,2.30) | 1.50(1.10,2.30) | 0.401 |
| HDL-C (mmol/L), *M* (P25,P75) | 1.33(1.12,1.57) | 1.31(1.12,1.55) | 0.249 |
| LDL-C (mmol/L), *M* (P25,P75) | 3.00(2.55,3.49) | 2.99(2.53,3.51) | 0.372 |
| FPG (mmol/L), *M* (P25,P75) | 5.00(4.70,5.50) | 5.00(4.60,5.50) | 0.178 |
| eGFR (mL/min/1.73m2), *M* (P25,P75) | 106.23(96.42,113.52) | 103.37(93.56,111.57) | <0.001 |

SUA, serum uric acid; BMI, body mass index; SBP, systolic blood pressure; DBP, diastolic blood pressure; TC, total cholesterol; TG, triglycerides; HDL-C, high-density lipoprotein cholesterol; LDL-C, low-density lipoprotein cholesterol; FPG, fasting plasma glucose; eGFR, estimated glomerular filtration rate.

Household income, Household monthly income per capita; Hyperuricemia, SUA ≧ 420 μmol/L for males and SUA ≧ 360 μmol/L for females.
